# Supplementary material for: Application of Policy Deployment and Daily Management in service sector
Source: Springer Nature journal article supplement (doi:10.1186/s40887-017-0017-6), 2017-11-02
Supplement: MOESM1 [file 15188902]

|         |                                                                               |
|---------|-------------------------------------------------------------------------------|
|         | Your Name:                                                                    |
|         | Your Organisation:                                                            |
|         |                                                                               |
| Sl. No. | Question                                                                      |
| 1       | What process do you use for Business Planning?                                |
|         | a. Strategic Planning                                                         |
|         | b. Policy Management/ Hoshin Kanri                                            |
|         | c. Balanced Score Card                                                        |
|         | d. Any other (Pl specify)                                                     |
|         |                                                                               |
| 2       | What is major concern in your organisation?                                   |
|         | a. Strategy formulation                                                       |
|         | b. Strategy execution                                                         |
|         | c. Both                                                                       |
|         | d. None                                                                       |
|         |                                                                               |
| 3       | How many priority areas do you focus?                                         |
|         | a. 3-5                                                                        |
|         | b. 5-8                                                                        |
|         | c. 8-10                                                                       |
|         | d. No Limit                                                                   |
|         |                                                                               |
| 4       | What is the period of business planning cycle?                                |
|         | a. One Year                                                                   |
|         | b. Six Monthly                                                                |
|         | c. Less than six month                                                        |
|         | d. More than a year                                                           |
|         |                                                                               |
| 5       | What does the Business Planning Process cover?                                |
|         | a. Identification of KPIs                                                     |
|         | b. Identification of KPIs and goals                                           |
|         | c. Identification of KPIs, goals and Means/ initiatives                       |
|         | d. Identification of KPIs, goals, Means/ initiatives and detailed action plan |
|         |                                                                               |
| 6       | How long you have practiced the Policy management/ Balanced Scorecard?        |
|         | a. < 1 year                                                                   |
|         | b. 1-3 years                                                                  |
|         | c. 3-5 years                                                                  |
|         | d. > 5 years                                                                  |
|         |                                                                               |
| 7       | How long it took to mature the system in your organisation?                   |
|         | a. < 1 year                                                                   |
|         | b. 1-2 years                                                                  |
|         | c. > 2 years                                                                  |
|         |                                                                               |
| 8       | What challenges you found in implementation? (You may tick more than 1 here)  |
|         | a. Understanding of the subject                                               |
|         | b. Role clarity                                                               |
|         | c. No or informal reviews                                                     |
|         | d. Focus on results only                                                      |
|         | e. Deployment to lower levels                                                 |
|         | f. Linkage with routine work                                                  |
|         | g. Difficult to sustain                                                       |
|         | h. Too many items to prioritise                                               |
|         | i. More top driven, middle and lower management involvement weak              |
|         | j. More suited to manufacturing sector                                        |
|         | k. Time consuming                                                             |
|         | l. More internal focused, no info of the market and business environment      |
|         | m. Lack of data to set the targets                                            |
|         | n. Target set too ambitious                                                   |
|         | o. Any other (Please specify)                                                 |
|         |                                                                               |
| 9       | How did you address the above challenges?                                     |
|         | a. Training across the organisation                                           |
|         | b. Developing Internal Manual for consistent application                      |
|         | c. Mentoring by leadership team                                               |
|         | d. Mentoring by external consultant/guide                                     |
|         | e. Learnt from other companies                                                |
|         | f. Spent time for environemnt and market scanning                             |
|         | g. Revisited the review mechanism                                             |
|         | h. Used only 3-5 focused items of high priority for the year                  |
|         | i. Any other (Please specify)                                                 |
|         |                                                                               |
| 10      | Future plans to stengthen the system (please elaborate in max 100 words)      |
|         |                                                                               |
|         |                                                                               |
|         |                                                                               |
